# Supplementary material
Source: PubMed Central journal article supplement (PMC7127960)

A.

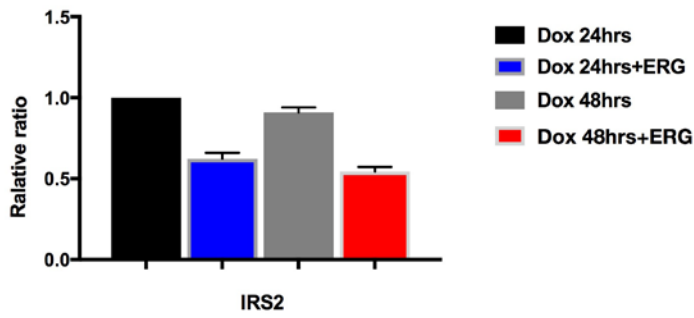

B.

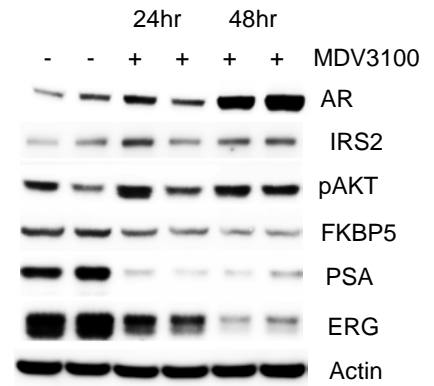

C.

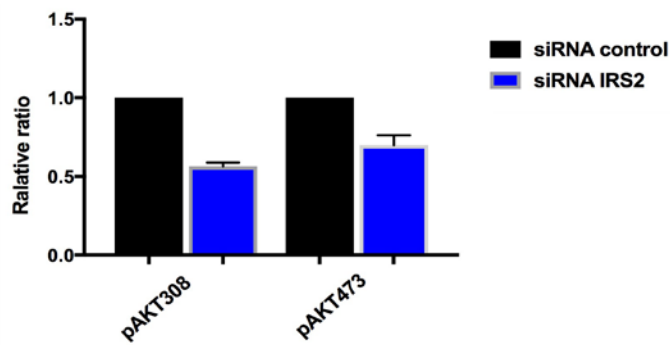

D.

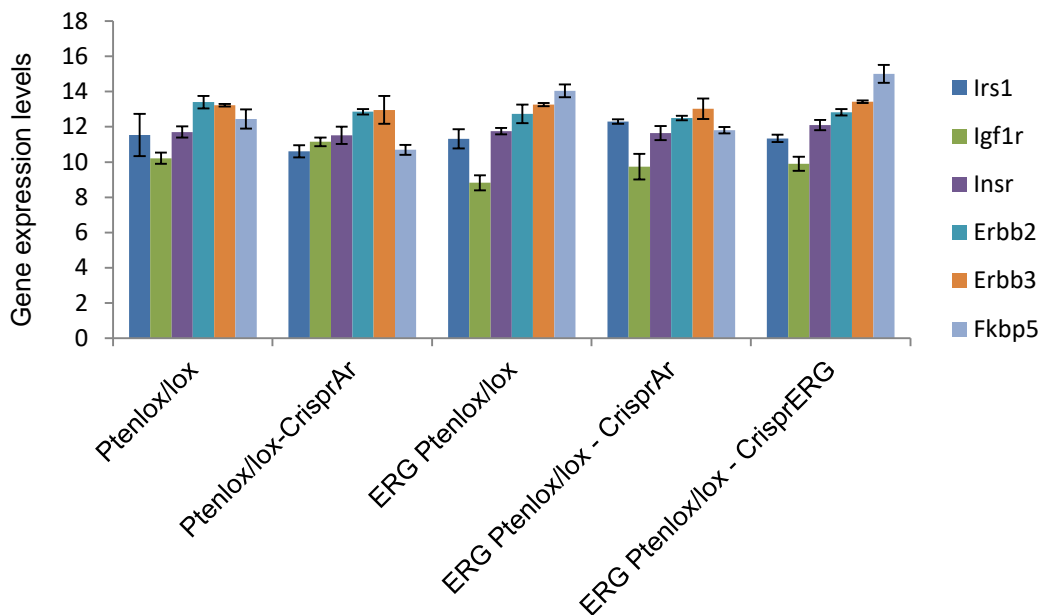

A.

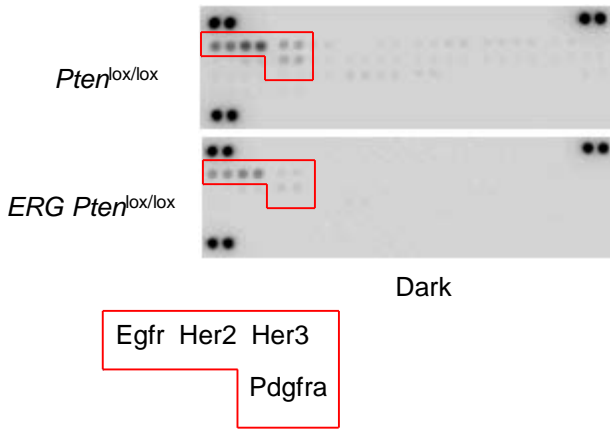

B.

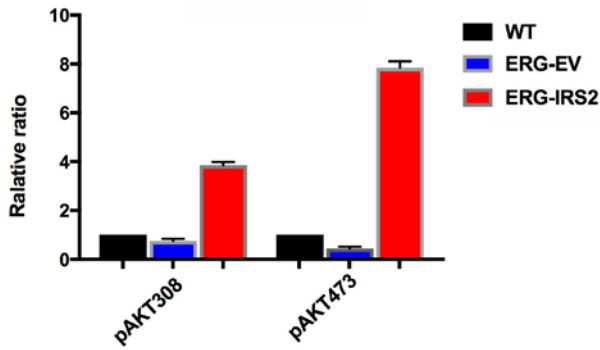

C.

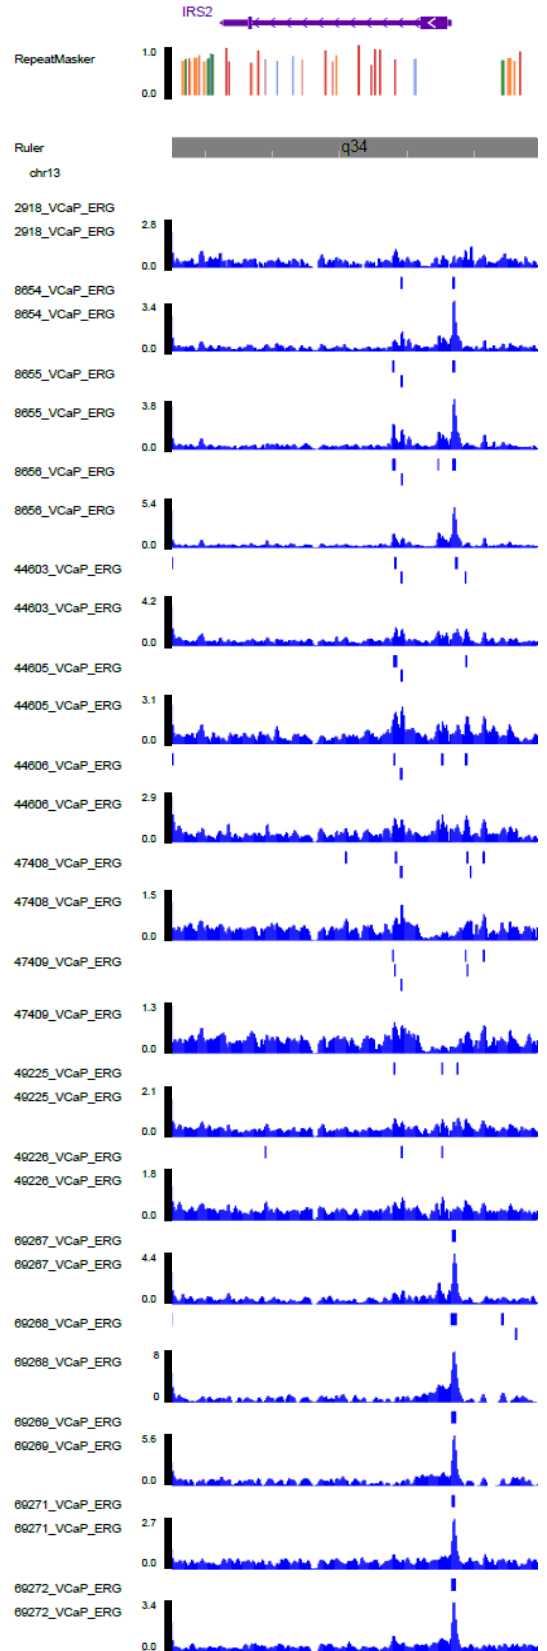

A.

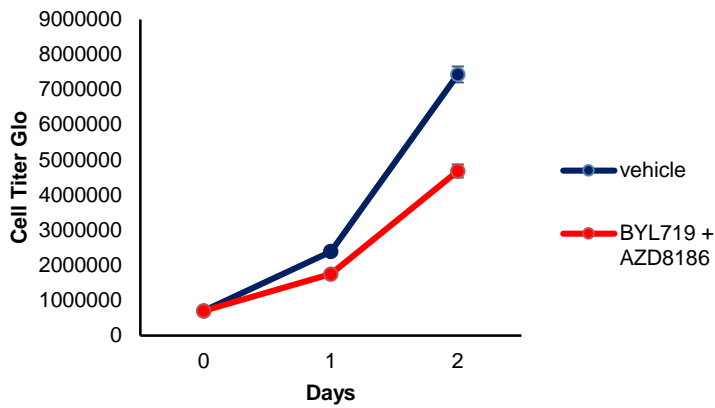

B.

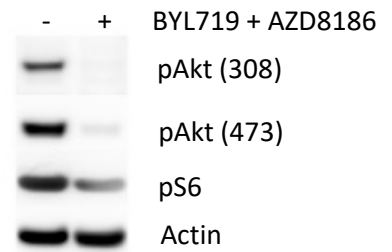

C.

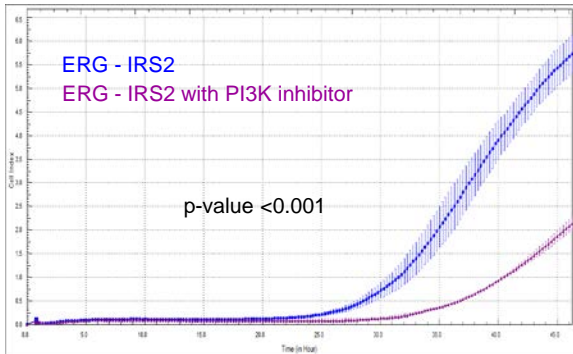

D.

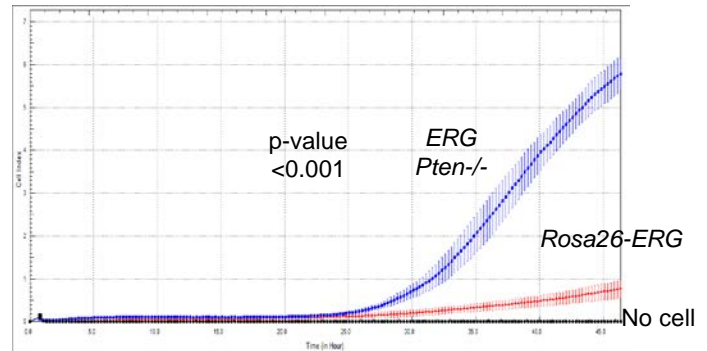

E.

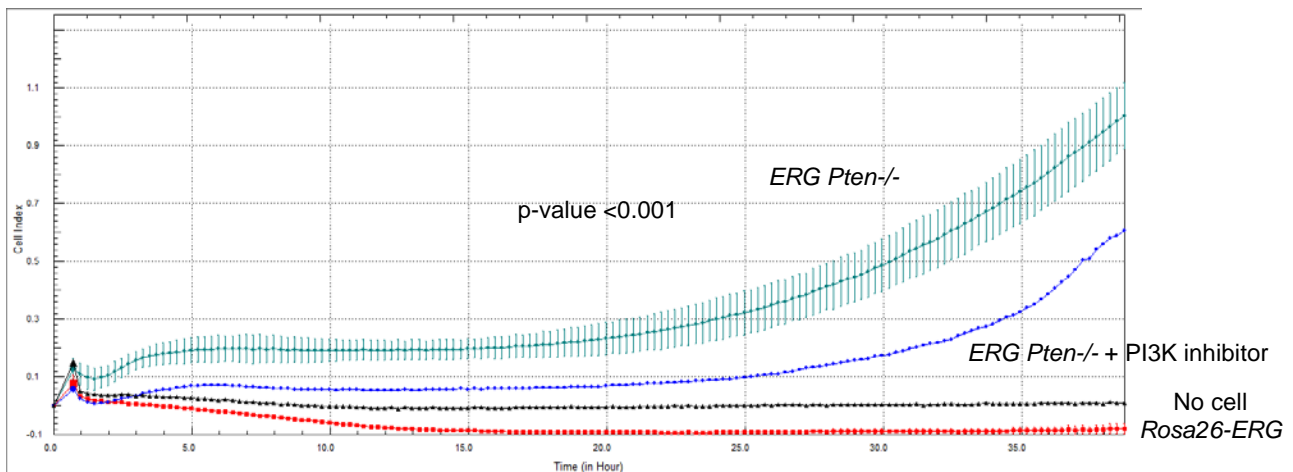

H&E

*ERG* –  
*Vector*

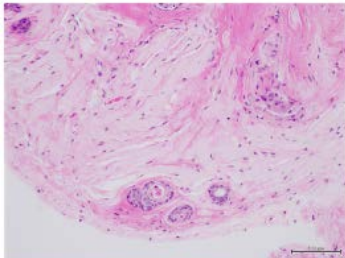

*ERG* –  
*IRS2*

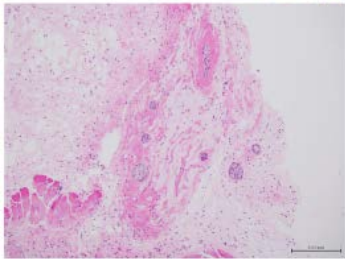

Supplement: NIHMS1557406-supplement-2.pdf [file NIHMS1557406-supplement-2.pdf]
